# Estimation of Short-Term Effects of Air Pollution on Stroke Hospital Admissions in Wuhan, China

Hao Xiang<sup>1,2</sup>, Kristen J. Mertz<sup>3</sup>, Vincent C. Arena<sup>4</sup>, Luann L. Brink<sup>3</sup>, Xiaohui Xu<sup>5</sup>, Yongyi Bi<sup>2,6</sup>, Evelyn O. Talbott<sup>3\*</sup>

**1** Department of Epidemiology and Biostatistics, School of Public Health, Wuhan University, Wuhan, Hubei, China, **2** Wuhan University Global Health Institute, Wuhan University, Wuhan, Hubei, China, **3** Department of Epidemiology, Graduate School of Public Health, University of Pittsburgh, Pittsburgh, Pennsylvania, United States of America, **4** Department of Biostatistics, Graduate School of Public Health, University of Pittsburgh, Pittsburgh, Pennsylvania, United States of America, **5** Department of Epidemiology, College of Public Health and Health Professions, College of Medicine, University of Florida, Gainesville, Florida, United States of America, **6** Department of Labor and Environmental Hygiene, School of Public Health, Wuhan University, Wuhan, Hubei, China

## Abstract

**Background and Objective:** High concentrations of air pollutants have been linked to increased incidence of stroke in North America and Europe but not yet assessed in mainland China. The aim of this study is to evaluate the association between stroke hospitalization and short-term elevation of air pollutants in Wuhan, China.

**Methods:** Daily mean NO<sub>2</sub>, SO<sub>2</sub> and PM<sub>10</sub> levels, temperature and humidity were obtained from 2006 through 2008. Data on stroke hospitalizations (ICD 10: I60–I69) at four hospitals in Wuhan were obtained for the same period. A time-stratified case-crossover design was performed by season (April–September and October–March) to assess effects of pollutants on stroke hospital admissions.

**Results:** Pollution levels were higher in October–March with averages of 136.1 µg/m<sup>3</sup> for PM<sub>10</sub>, 63.6 µg/m<sup>3</sup> for NO<sub>2</sub> and 71.0 µg/m<sup>3</sup> for SO<sub>2</sub> than in April–September when averages were 102.0 µg/m<sup>3</sup>, 41.7 µg/m<sup>3</sup> and 41.7 µg/m<sup>3</sup>, respectively ( $p < .001$ ). During the cold season, every 10 µg/m<sup>3</sup> increase in NO<sub>2</sub> was associated with a 2.9% (95% C.I. 1.2%–4.6%) increase in stroke admissions on the same day. Every 10 µg/m<sup>3</sup> increase in PM<sub>10</sub> daily concentration was significantly associated with an approximate 1% (95% C.I. 0.1%–1.4%) increase in stroke hospitalization. A two-pollutant model indicated that NO<sub>2</sub> was associated with stroke admissions when controlling for PM<sub>10</sub>. During the warm season, no significant associations were noted for any of the pollutants.

**Conclusions:** Exposure to NO<sub>2</sub> is significantly associated with stroke hospitalizations during the cold season in Wuhan, China when pollution levels are 50% greater than in the warm season. Larger and multi-center studies in Chinese cities are warranted to validate our findings.

**Citation:** Xiang H, Mertz KJ, Arena VC, Brink LL, Xu X, et al. (2013) Estimation of Short-Term Effects of Air Pollution on Stroke Hospital Admissions in Wuhan, China. PLoS ONE 8(4): e61168. doi:10.1371/journal.pone.0061168

**Editor:** Michelle L. Block, Virginia Commonwealth University, United States of America

**Received:** July 24, 2012; **Accepted:** March 7, 2013; **Published:** April 12, 2013

**Copyright:** © 2013 Xiang et al. This is an open-access article distributed under the terms of the Creative Commons Attribution License, which permits unrestricted use, distribution, and reproduction in any medium, provided the original author and source are credited.

**Funding:** These authors have no support or funding to report.

**Competing Interests:** The authors have declared that no competing interests exist.

\* E-mail: eot1@pitt.edu

## Introduction

Numerous epidemiological studies have demonstrated increased risk for acute myocardial infarction (MI), coronary heart disease (CHD) and other cardiovascular mortality associated with acute exposure to ambient air pollutants [1–4]. More recently, studies have focused on morbidity with use of hospital admission data to assess the short-term effects of air pollution on stroke; however, the results of these studies are inconsistent. Some studies have found associations between air pollution and stroke hospital admissions [5–11], while other studies have reported no significant links [12–16]. Moreover, most studies have been conducted in North American and European cities [5–7,9,13,14,17] with only limited information from Asia [8,12,18].

Wuhan is the capital of Hubei Province and the most populous city in Central China. There are approximately 10 million people in the metropolitan area, with approximately 6 million in the

center city within an area of 201 km<sup>2</sup>. Wuhan's climate is subtropical with abundant rainfall and very high humidity in the spring and summer. Wuhan's major industries include optic-electronics, automobile manufacturing, steel manufacturing, chemical plants and power plants; it is also a major transportation hub. The major sources of air pollution in the city are motor vehicles and the use of coal for domestic cooking, heating, and industrial processes [19,20].

Qian et al's study in Wuhan showed that every 10 µg/m<sup>3</sup> increase in daily PM<sub>10</sub> concentration was significantly associated with an increase in stroke mortality (0.44%) on the same day [20]; however, the effect of air pollution on stroke hospital admissions has not been assessed in Wuhan, which has a hotter climate and higher levels of pollutants than most places studied to date. The objective of this study is to assess the associations between hospitalizations for stroke and short-term elevations in particulate

matter with diameter  $<10 \mu\text{m}$  ( $\text{PM}_{10}$ ), nitrogen dioxide ( $\text{NO}_2$ ) and sulfur dioxide ( $\text{SO}_2$ ), in Wuhan, China. The research covers a 3-year period from 2006 through 2008.

## Materials and Methods

### Ethics Statement

This study was approved by the Institutional Review Boards of Wuhan University and the University of Pittsburgh. Because the data were analyzed anonymously, names of participants were not essential, and we did not collect the names of participant. Informed consent from human participant was not necessary in this study.

### Study Population

Hospital admission data for this analysis were collected from four major medical centers with a total of 10,000 beds in the center city because there is no unified hospital data collection system for all hospitals in Wuhan. We obtained electronic data for all hospital admissions for acute strokes (International Classification of Diseases, 10th Revision: I60–I69) from January 1, 2006 through December 31, 2008, including admission date, age, sex, and discharge diagnostic code (ICD-10).

### Exposure Information

Nine monitoring stations operated by the Wuhan Environmental Monitoring Center in the metropolitan area measure levels of air pollution. The monitoring program has been certified by the US Environment Protection Agency (EPA). We obtained the mean daily Air Pollution Index (API) of  $\text{PM}_{10}$ ,  $\text{NO}_2$  and  $\text{SO}_2$  for the 9 monitoring stations for the period January 1, 2006 through December 31, 2008. API reporting system, based on health effects, is introduced for a consistent comparison among the pollution levels by different air pollutants. In China, the API system has been applied in cities from 1997 [21]. Other similar index systems are also used in other countries, for example, AQI (Air Quality Index) in Canada, IMECA (Air Quality Metropolitan Index) in Mexico and PSI (Pollutant Standards Index) in Singapore. According to the breakpoints of air pollutant and the transform formula between API and air pollutant concentrations. We converted the API values to concentration levels using standard formula [22]. Meteorological data, including mean daily temperature and relative humidity, were obtained from the Wuhan Meteorological Administration.

### Data Analysis

A time-stratified case-crossover study design was used to evaluate the association between air pollution and the number of stroke admissions. This method is a special case-control design used to explore the effects of transient exposures on acute events, in which every case serves as his or her own control [22,23]. We compared the air pollution exposure on the current day (lag 0) of the stroke onset to exposure on the same weekdays during the same month as the lag 0 day. Because previous studies indicated that increased hospital admissions were associated with high air pollution levels up to 2 days before the event [24], we also considered pollution concentrations one or two days before stroke admission (lag1, lag2) and the accumulated exposure over 3 days (mean of lag 0 through lag 2). This design is useful for controlling for seasonality, time trends, and other potential confounders [25].

We performed multivariate conditional logistic regression modeling to obtain estimates of the odds ratios (ORs) and 95% confidence intervals (CIs) for the effect of  $\text{PM}_{10}$ ,  $\text{NO}_2$  and  $\text{SO}_2$  on stroke hospitalization, controlling for meteorological covariates

including daily mean temperature and relative humidity. For understanding the mean effect of air pollution during lag 0–2 day, we calculated lag 0–2 with available data, we reported effect estimates as the percentage of change in the rate of hospitalizations associated with a  $10 \mu\text{g}/\text{m}^3$  increase in mean daily pollutant levels. Subgroup analysis is based on age group ( $\geq 65$  years and  $< 65$  years), sex (male and female), categories of stroke (hemorrhagic stroke: I61 and ischemic stroke: I63) and seasons (warm: April–September and cold: October–March). All of the reported *p*-values are based on 2-sided tests at the 0.05 level. Analyses were performed using SAS Version 9 and the C-CAT package [26].

## Results

We observed 10663 hospital admissions with a primary discharge diagnosis of stroke from four major hospitals, of which 51% ( $n = 5422$ ) were coded as ischemic, 21% ( $n = 2225$ ) as hemorrhagic, and 28% ( $n = 3016$ ) as other. Age on admission ranged from 0 to 98 years with a mean of 64(S.D.14) years, and 51% ( $n = 5480$ ) of those admitted were equal or older than 65 years. Approximately 61% of cases were male.

A summary of air pollutants and meteorological parameters is shown in Table 1. During the 1096 days of our study period, daily mean temperatures fluctuated between  $-2.7$  and  $33.6^\circ\text{C}$ . The overall mean concentrations of pollutants were  $119 \pm 53 \mu\text{g}/\text{m}^3$  for  $\text{PM}_{10}$ ,  $53 \pm 21 \mu\text{g}/\text{m}^3$  for  $\text{NO}_2$ , and  $56 \pm 31 \mu\text{g}/\text{m}^3$  for  $\text{SO}_2$ . There were significant differences ( $P < 0.001$ ) in pollution levels by season with the April through September means of  $102.0 \mu\text{g}/\text{m}^3$  for  $\text{PM}_{10}$ ,  $41.7 \mu\text{g}/\text{m}^3$  for  $\text{NO}_2$  and  $41.7 \mu\text{g}/\text{m}^3$  for  $\text{SO}_2$ , and the October through March means of  $136.1 \mu\text{g}/\text{m}^3$ ,  $63.6 \mu\text{g}/\text{m}^3$  and  $71.0 \mu\text{g}/\text{m}^3$ , respectively. (Table 1).

As shown in Table 2, none of the single-pollutant models with lag 0, lag 1 and lag 2 were associated with hospital admissions for stroke, ischemic stroke or hemorrhagic stroke with all seasons combined. Subgroup analysis by age and sex found no significant associations.

The associations between air pollutants and stroke hospitalization by season are presented in Table 3. For the cold season, significant associations were found between stroke hospital admissions and levels of  $\text{PM}_{10}$  and  $\text{NO}_2$ . Every  $10 \mu\text{g}/\text{m}^3$  increase in  $\text{NO}_2$  was associated with a 2.9% (95% C.I. 1.2%–4.6%) increase in stroke events on the same day and a 2.1% increase 2 days later. In addition, each  $10 \mu\text{g}/\text{m}^3$  increase in  $\text{PM}_{10}$  daily concentration was significantly associated with an approximate 0.7% (95% C.I. 0.1%–1.4%) increase in stroke hospitalization the next day.  $\text{SO}_2$  levels had no significant effect on stroke hospitalization (Table 3). For the warm season, a time when the pollution levels were lower, no significant associations with stroke hospitalization were noted for any of the pollutants controlling for temperature and humidity.

A two-pollutant model was examined to determine which individual pollutant might influence stroke occurrence independently of the effect of the other (Table 4).

$\text{SO}_2$  was not included in this model because it was not significantly associated with hospital admissions for stroke. For the cold season, there was no significant association between  $\text{PM}_{10}$  and stroke admissions after adjusting for  $\text{NO}_2$ ; however, the effect of  $\text{NO}_2$  remained significant after adjusting for  $\text{PM}_{10}$ .

## Discussion

This is one of the few investigations of the association between short-term health effects and air pollution in mainland China. Single-pollutant models, when adjusted for temperature and humidity, indicated a significant effect from  $\text{NO}_2$  and  $\text{PM}_{10}$  on

**Table 1.** Ambient air pollution concentrations and meteorological parameters in Wuhan, 2006–2008.

|                                       | Mean | Min. | Q1*  | Median | Q3*  | Max. | Apr.-Sep. Median<br>(n = 549 days) | Oct.-Mar. Median<br>(n = 547 days) |
|---------------------------------------|------|------|------|--------|------|------|------------------------------------|------------------------------------|
| <b>Pollutants</b>                     |      |      |      |        |      |      |                                    |                                    |
| PM <sub>10</sub> (μg/m <sup>3</sup> ) | 119  | 35   | 78   | 110    | 148  | 350  | 94 <sup>†</sup>                    | 132                                |
| NO <sub>2</sub> (μg/m <sup>3</sup> )  | 53   | 18   | 35   | 48     | 66   | 154  | 38 <sup>†</sup>                    | 66                                 |
| SO <sub>2</sub> (μg/m <sup>3</sup> )  | 56   | 8    | 33   | 50     | 72   | 267  | 38 <sup>†</sup>                    | 61                                 |
| <b>Meteorology</b>                    |      |      |      |        |      |      |                                    |                                    |
| Temperature (°C)                      | 18.2 | -2.7 | 9.9  | 19.6   | 26.3 | 33.6 | 26.2                               | 10.0                               |
| Humidity (%)                          | 69.6 | 21.0 | 61.0 | 70.5   | 78.0 | 97.0 | 68.0                               | 73.0                               |

\*Q1, first quartile value; Q3, third quartile value.

<sup>†</sup>There are significant differences in PM<sub>10</sub>, NO<sub>2</sub>, SO<sub>2</sub> concentration in summer/fall and winter/spring, Wilcoxon test  $P < 0.001$ .

doi:10.1371/journal.pone.0061168.t001

stroke hospital admissions during the cold season. The two-pollutant model showed that the effect of NO<sub>2</sub> remained significant after adjusting for PM<sub>10</sub>.

It should be noted that hospital admissions for hemorrhagic and ischemic strokes, when analyzed separately, were not associated with levels of any air pollutants in single-pollutant models in our study. Given that there were only 2, 225 hemorrhagic and 5, 422 ischemic stroke admissions during the three-year period, we believe that there may be a lack of statistical power to identify such a risk.

Seasonal effects between air pollution and hospital admissions have been reported frequently, and various explanations have been postulated. In the present study, we found that during the warm season, no significant associations were obtained. In contrast, for the cold season of October through March, stroke admissions and PM<sub>10</sub> and NO<sub>2</sub> levels were significantly associated. One explanation is that the concentrations of pollutants during the warm season were much lower than in the cold season; the

association between air pollution and stroke hospitalization is stronger when pollution levels are higher.

There are three main reasons for higher air pollution levels in the cold season in Wuhan. First, the amount of rainfall decreases significantly in the cold season. The average precipitation in November, December, and January were 2.04, 1.02, 1.71 inches respectively, in contrast to the average rainfall in May, June, and July of 6.47, 8.86, 7.49 inches. Rainfall plays an important role in chemical reactions with air pollutants, diluting their effects. [27] Second, Wuhan was almost controlled by stagnant air and there is less wind in winter than in summer, which went against pollutants diffusion. The formation of inversion layer also made air suspended particles hard to diffuse to high altitude but close to the ground. Third, coal emissions are higher on cold days because of the greater use of coal for electricity and heating. Under extreme conditions, in relative high temperature and low humidity days in winter, air pollutants could be transferred into secondary

**Table 2.** Association of all strokes, ischemic and hemorrhagic strokes and pollutant concentrations by lag days for 10 μg/m<sup>3</sup> increases in pollutant levels adjusted for temperature and humidity, Wuhan, 2006–2008.

| Lag days               | Stroke N = 10663   |         | Ischemic Stroke N = 5422 |         | Hemorrhagic Stroke N = 2225 |         |
|------------------------|--------------------|---------|--------------------------|---------|-----------------------------|---------|
|                        | O.R. (95%C.I.)     | P Value | O.R. (95%C.I.)           | P Value | O.R. (95%C.I.)              | P Value |
| <b>PM<sub>10</sub></b> |                    |         |                          |         |                             |         |
| 0                      | 0.997(0.989,1.005) | 0.4350  | 0.999(0.992,1.006)       | 0.7394  | 0.993(0.982,1.004)          | 0.2265  |
| 1                      | 0.997(0.990,1.005) | 0.5189  | 1.000(0.993,1.007)       | 0.8932  | 0.998(0.987,1.008)          | 0.6485  |
| 2                      | 0.996(0.988,1.004) | 0.3134  | 1.007(0.992,1.005)       | 0.6358  | 0.999(0.989,1.009)          | 0.8663  |
| 0–2                    | 0.995(0.985,1.005) | 0.3048  | 1.005(0.990,1.007)       | 0.7016  | 0.995(0.983,1.008)          | 0.4706  |
| <b>NO<sub>2</sub></b>  |                    |         |                          |         |                             |         |
| 0                      | 0.997(0.977,1.018) | 0.7902  | 1.002(0.984,1.021)       | 0.8267  | 0.989(0.961,1.018)          | 0.4421  |
| 1                      | 0.994(0.973,1.015) | 0.5703  | 1.003(0.969,1.006)       | 0.1849  | 1.007(0.978,1.036)          | 0.6403  |
| 2                      | 1.010(0.989,1.031) | 0.3566  | 1.000(0.982,1.019)       | 0.9704  | 1.004(0.976,1.032)          | 0.7990  |
| 0–2                    | 1.004(0.977,1.031) | 0.7703  | 1.004(0.973,1.018)       | 0.6672  | 1.000(0.965,1.035)          | 0.9841  |
| <b>SO<sub>2</sub></b>  |                    |         |                          |         |                             |         |
| 0                      | 1.001(0.986,1.016) | 0.8792  | 0.996(0.983,1.009)       | 0.5549  | 0.996(0.976,1.016)          | 0.6773  |
| 1                      | 0.992(0.978,1.006) | 0.2824  | 0.994(0.982,1.007)       | 0.3740  | 1.003(0.984,1.022)          | 0.7943  |
| 2                      | 0.991(0.977,1.005) | 0.1989  | 0.996(0.984,1.009)       | 0.5825  | 0.991(0.973,1.011)          | 0.3784  |
| 0–2                    | 0.991(0.972,1.010) | 0.3587  | 0.993(0.977,1.009)       | 0.3922  | 0.995(0.971,1.019)          | 0.6658  |

doi:10.1371/journal.pone.0061168.t002

**Table 3.** The association of stroke admissions and air pollutants in cold (winter and spring) and warm (summer and fall) seasons for 10  $\mu\text{g}/\text{m}^3$  increases in pollutant level, adjusted for temperature and humidity, Wuhan, 2006–2008.

| Lag Days               | Cold seasons N = 5341 |         | Warm seasons N = 5322 |         |
|------------------------|-----------------------|---------|-----------------------|---------|
|                        | O.R. (95% C.I.)       | P Value | O.R. (95% C.I.)       | P Value |
| <b>PM<sub>10</sub></b> |                       |         |                       |         |
| 0                      | 1.006(0.999,1.013)    | 0.0875  | 1.000(0.999,1.000)    | 0.3174  |
| 1                      | 1.007(1.001,1.014)    | 0.0300  | 0.995(0.988,1.002)    | 0.1442  |
| 2                      | 1.005(0.999,1.012)    | 0.0830  | 0.996(0.989,1.002)    | 0.1860  |
| 0–2                    | 1.009(1.001,1.016)    | 0.0256  | 0.994(0.985,1.002)    | 0.1555  |
| <b>NO<sub>2</sub></b>  |                       |         |                       |         |
| 0                      | 1.029(1.012,1.046)    | 0.0007  | 0.998(0.980,1.016)    | 0.8207  |
| 1                      | 1.012(0.995,1.029)    | 0.1620  | 0.983(0.965,1.001)    | 0.0681  |
| 2                      | 1.021(1.005,1.037)    | 0.0096  | 0.996(0.978,1.014)    | 0.6584  |
| 0–2                    | 1.031(1.011,1.052)    | 0.0025  | 0.990(0.967,1.014)    | 0.4096  |
| <b>SO<sub>2</sub></b>  |                       |         |                       |         |
| 0                      | 1.004(0.993,1.015)    | 0.4677  | 0.997(0.984,1.010)    | 0.6519  |
| 1                      | 0.996(0.986,1.007)    | 0.4929  | 0.988(0.976,1.001)    | 0.0621  |
| 2                      | 0.997(0.986,1.007)    | 0.5258  | 0.994(0.981,1.006)    | 0.3251  |
| 0–2                    | 0.997(0.983,1.011)    | 0.6844  | 0.987(0.970,1.004)    | 0.1307  |

doi:10.1371/journal.pone.0061168.t003

aerosol and lead to more serious pollution, even formed haze or smog.

It is widely accepted that there is a significant association between mortality and PM<sub>10</sub> levels. [5,6,8] Recent studies showed that air particles maybe a possible causal factor in stroke mortality [28] [29,30]. Several potential mechanisms have been proposed. First, it has been hypothesized that particulate exposure can induce an acute systemic inflammatory response with an increased number of circulating neutrophils [28], provoking inflammation and increased blood coagulation. [29] Second, particles may affect the autonomic nervous system resulting in increased risk for heart rate variability. [30] Third, particles can increase concentrations of fibrinogen [31] and enhance peripheral arterial thrombosis [32], which will promote stroke. Exposure to cold days has also been proved to increase plasma viscosity and serum cholesterol levels, which is also regarded as a stimulus to stroke [33].

In this study, PM<sub>10</sub> was significantly associated with stroke hospitalizations in the cold season in a single pollutant model, but not after adjusting for NO<sub>2</sub>. The reason why our result is inconsistent with the past studies may be due to the problem of collinearity between air pollutants (the Pearson correlation between PM<sub>10</sub> and NO<sub>2</sub> is 0.75, see supplement Table S1), it was difficult to separate the effect of individual pollutants on stroke admission. Haidong Kan et al's study showed that in single air pollutant models, each 10  $\mu\text{g}/\text{m}^3$  increase in PM<sub>10</sub> and NO<sub>2</sub> corresponded to 1.008 and 1.029 relative risks of stroke mortality, respectively, but in multiple pollutant models, there were no significant associations [34].

The importance of NO<sub>2</sub> as a cause of increased stroke admissions is not sufficiently understood. We cannot rule out the possibility that NO<sub>2</sub> acts, at least in part, as a surrogate for some other unmeasured end product of reaction sequences initiated by NO<sub>2</sub>.

The strengths of our study include the fact that data were derived from the electronic data of four major medical centers,

**Table 4.** Relationship between stroke and PM<sub>10</sub> and NO<sub>2</sub> concentrations in a two-pollutant model in the cold season for 10  $\mu\text{g}/\text{m}^3$  increases in pollutant level, adjusted for temperature and humidity.

| Pollutant              | O.R. (95% C.I.)    | P      |
|------------------------|--------------------|--------|
| <b>PM<sub>10</sub></b> |                    |        |
| 0                      | 0.995(0.986,1.005) | 0.3305 |
| 1                      | 1.008(0.999,1.017) | 0.0931 |
| 2                      | 0.998(0.989,1.008) | 0.7333 |
| 0–2                    | 0.999(0.987,1.011) | 0.8945 |
| <b>NO<sub>2</sub></b>  |                    |        |
| 0                      | 1.037(1.013,1.061) | 0.0021 |
| 1                      | 0.997(0.973,1.021) | 0.7955 |
| 2                      | 1.024(1.000,1.049) | 0.0496 |
| 0–2                    | 1.033(1.001,1.065) | 0.0412 |

doi:10.1371/journal.pone.0061168.t004

which provided relative accurate information and allowed us to stratify the effect of air pollution by age, sex and stroke type. A further strength of our study was the availability of data on PM<sub>10</sub>, SO<sub>2</sub> and NO<sub>2</sub> levels from Wuhan Environmental Monitoring Center, which could be linked for the first time to stroke admissions in Wuhan city. Finally, the case-crossover studies design control for confounders by design rather than by modeling [21,35]. As a result, time-invariant variables such as sex, age and family history do not act as confounders. In addition, by using the same weekdays as the onset day as controls could avoid possible confounding from the effects of day of the week [22,36].

We do acknowledge that our study has several limitations. First, there is no unified hospital data collection system for all hospitals in Wuhan, and it is not possible to obtain data on all the stroke admissions in the city during the study period. However, the catchment area of these four hospitals is relatively stable. Second, we used the mean air pollutant concentrations from nine monitoring stations to estimate individuals' exposure because the air pollutants are highly correlated in 9 monitors. However, errors in exposure estimation resulting from the differences between the population-average exposure and local ambient levels cannot be avoided. Such exposure misclassification may lead to inaccurate results, as reported in previous studies [37,38]. Third, it should also be noted that Wuhan has a subtropical humid monsoon climate, and this fact may restrict the generalization of these findings to other locations with different meteorological characteristics. However, this would not affect the study's internal validity.

In summary, our study shows that there is an association between exposure to air pollution and hospital admissions for stroke during the cold season in Wuhan, China. Although these findings support the possibility that there are acute pathogenetic processes in the cerebrovascular system induced by air pollution, the mechanism is still not clear and toxicological analyses are expected in further studies.

## Supporting Information

**Table S1 Pearson correlation coefficient.** This table described correlation coefficient among daily air pollution and weather variables. (DOC)

## Acknowledgments

We thank Dr. Jiming Fang of Department of Medicine, University of Toronto and Institute for Clinical Evaluative Sciences for his thoughtful comments.

## References

- Peters A, Dockery DW, Muller JE, Mittleman MA (2001) Increased particulate air pollution and the triggering of myocardial infarction. *Circulation* 103: 2810–2815.
- D'Ippoliti D, Forastiere F, Ancona C, Agabiti N, Fusco D, et al. (2003) Air pollution and myocardial infarction in Rome: a case-crossover analysis. *Epidemiology* 14: 528–535.
- Rich DQ, Schwartz J, Mittleman MA, Link M, Luttmann-Gibson H, et al. (2005) Association of short-term ambient air pollution concentrations and ventricular arrhythmias. *Am J Epidemiol* 161: 1123–1132.
- Wellenius GA, Bateson TF, Mittleman MA, Schwartz J (2005) Particulate air pollution and the rate of hospitalization for congestive heart failure among medicare beneficiaries in Pittsburgh, Pennsylvania. *Am J Epidemiol* 161: 1030–1036.
- Wordley J, Walters S, Ayres JG (1997) Short term variations in hospital admissions and mortality and particulate air pollution. *Occup Environ Med* 54: 108–116.
- Ponka A, Virtanen M (1996) Low-level air pollution and hospital admissions for cardiac and cerebrovascular diseases in Helsinki. *Am J Public Health* 86: 1273–1280.
- Wellenius GA, Schwartz J, Mittleman MA (2005) Air pollution and hospital admissions for ischemic and hemorrhagic stroke among medicare beneficiaries. *Stroke* 36: 2549–2553.
- Tsai SS (2003) Evidence for an Association Between Air Pollution and Daily Stroke Admissions in Kaohsiung, Taiwan. *Stroke* 34: 2612–2616.
- Ballester F, Tenias JM, Perez-Hoyos S (2001) Air pollution and emergency hospital admissions for cardiovascular diseases in Valencia, Spain. *J Epidemiol Community Health* 55: 57–65.
- Moolgavkar SH (2000) Air pollution and hospital admissions for diseases of the circulatory system in three U.S. metropolitan areas. *J Air Waste Manag Assoc* 50: 1199–1206.
- Linn WS, Szlachcic Y, Gong H, Jr., Kinney PL, Berhane KT (2000) Air pollution and daily hospital admissions in metropolitan Los Angeles. *Environ Health Perspect* 108: 427–434.
- Wong TW, Lau TS, Yu TS, Neller A, Wong SL, et al. (1999) Air pollution and hospital admissions for respiratory and cardiovascular diseases in Hong Kong. *Occup Environ Med* 56: 679–683.
- Le Tertre A, Medina S, Samoli E, Forsberg B, Michelozzi P, et al. (2002) Short-term effects of particulate air pollution on cardiovascular diseases in eight European cities. *J Epidemiol Community Health* 56: 773–779.
- Poloniecki JD, Atkinson RW, de Leon AP, Anderson HR (1997) Daily time series for cardiovascular hospital admissions and previous day's air pollution in London, UK. *Occup Environ Med* 54: 535–540.
- Burnett RT, Smith-Doiron M, Stieb D, Cakmak S, Brook JR (1999) Effects of particulate and gaseous air pollution on cardiorespiratory hospitalizations. *Arch Environ Health* 54: 130–139.
- Sunyer J, Ballester F, Tertre AL, Atkinson R, Ayres JG, et al. (2003) The association of daily sulfur dioxide air pollution levels with hospital admissions for cardiovascular diseases in Europe (The Aphea-II study). *Eur Heart J* 24: 752–760.
- Arena VC, Mazumdar S, Zborowski JV, Talbott EO, He S, et al. (2006) A Retrospective Investigation of PM10 in Ambient Air and Cardiopulmonary Hospital Admissions in Allegheny County, Pennsylvania: 1995–2000. *Journal of Occupational and Environmental Medicine* 48: 38–47.
- Chan CC (2005) Urban air pollution and emergency admissions for cerebrovascular diseases in Taipei, Taiwan. *European Heart Journal* 27: 1238–1244.
- Ali R, Zhao H (2008) Wuhan, China and Pittsburgh, USA: Urban Environmental Health Past, Present, and Future. *EcoHealth* 5: 159–166.
- Qian Z, He Q, Lin H, Kong L, Liao D, et al. (2007) Association of daily cause-specific mortality with ambient particle air pollution in Wuhan, China. *Environmental Research* 105: 380–389.
- Carracedo-Martinez E, Taracido M, Tobias A, Saez M, Figueiras A (2010) Case-crossover analysis of air pollution health effects: a systematic review of methodology and application. *Environ Health Perspect* 118: 1173–1182.
- Levy D, Lumley T, Sheppard L, Kaufman J, Checkoway H (2001) Referent selection in case-crossover analyses of acute health effects of air pollution. *Epidemiology* 12: 186–192.
- Tong S, Wang XY, Guo Y (2012) Assessing the short-term effects of heatwaves on mortality and morbidity in brisbane, australia: comparison of case-crossover and time series analyses. *PLoS One* 7: e37500.
- Katsouyanni K, Touloumi G, Spix C, Schwartz J, Balducci F, et al. (1997) Short-term effects of ambient sulphur dioxide and particulate matter on mortality in 12 European cities: results from time series data from the APHEA project. *Air Pollution and Health: a European Approach*. *BMJ* 314: 1658–1663.
- Wichmann J, Andersen Z, Ketzel M, Ellermann T, Loft S (2011) Apparent temperature and cause-specific emergency hospital admissions in Greater Copenhagen, Denmark. *PLoS One* 6: e22904.
- Abraham JH, Gold DR, Dockery DW, Ryan L, Park JH, et al. (2005) Within-home versus between-home variability of house dust endotoxin in a birth cohort. *Environ Health Perspect* 113: 1516–1521.
- Yang CY, Chen YS, Yang CH, Ho SC (2004) Relationship between ambient air pollution and hospital admissions for cardiovascular diseases in kaohsiung, taiwan. *J Toxicol Environ Health A* 67: 483–493.
- van Eeden SF, Hogg JC (2002) Systemic inflammatory response induced by particulate matter air pollution: the importance of bone-marrow stimulation. *J Toxicol Environ Health A* 65: 1597–1613.
- Seaton A, MacNee W, Donaldson K, Godden D (1995) Particulate air pollution and acute health effects. *Lancet* 345: 176–178.
- Fang SC, Cassidy A, Christiani DC (2010) A systematic review of occupational exposure to particulate matter and cardiovascular disease. *Int J Environ Res Public Health* 7: 1773–1806.
- Schwartz J (2001) Air pollution and blood markers of cardiovascular risk. *Environ Health Perspect* 109 Suppl 3: 405–409.
- Nemmar A, Hoet PH, Dinsdale D, Vermeylen J, Hoylaerts MF, et al. (2003) Diesel exhaust particles in lung acutely enhance experimental peripheral thrombosis. *Circulation* 107: 1202–1208.
- Hong YC (2002) Air Pollution: A New Risk Factor in Ischemic Stroke Mortality. *Stroke* 33: 2165–2169.
- Kan H, Jia J, Chen B (2003) Acute stroke mortality and air pollution: new evidence from Shanghai, China. *J Occup Health* 45: 321–323.
- Janes H, Sheppard L, Lumley T (2005) Case-crossover analyses of air pollution exposure data: referent selection strategies and their implications for bias. *Epidemiology* 16: 717–726.
- Maclure M (1991) The case-crossover design: a method for studying transient effects on the risk of acute events. *Am J Epidemiol* 133: 144–153.
- Zeger SL, Thomas D, Dominici F, Samet JM, Schwartz J, et al. (2000) Exposure measurement error in time-series studies of air pollution: concepts and consequences. *Environ Health Perspect* 108: 419–426.
- Zeka A, Schwartz J (2004) Estimating the independent effects of multiple pollutants in the presence of measurement error: an application of a measurement-error-resistant technique. *Environ Health Perspect* 112: 1686–1690.

## Author Contributions

Conceived and designed the experiments: EOT YB. Performed the experiments: HX YB KJM. Analyzed the data: HX KJM LLB VCA XX. Contributed reagents/materials/analysis tools: VCA XX LLB KJM EOT. Wrote the paper: HX KJM VCA XX EOT LLB.
